# Supplementary material for: One-pot synthesis of a hydrogen peroxide-selective fluorogenic probe and its application in Parkinson's diseasein vitroandvivomodels
Source: Royal Society of Chemistry journal article supplement (doi:10.1039/d0ma00318b), 2020-01-01
Supplement: d0ma00318b1.pdf [file d0ma00318b1.pdf]

## Supporting Information

### **One-pot synthesis of hydrogen peroxide selective fluorogenic probe and its application in Parkinson's disease *in vitro* and *vivo* models**

Yao Lu<sup>a,†</sup>, Bo Peng<sup>b,†</sup>, Xinghan Qiu<sup>a,†</sup>, Xin Li<sup>b</sup>, Zheng Li<sup>a</sup>, Duoteng Zhang<sup>a</sup>, Wenhui Ji<sup>a</sup>, Bin Fang<sup>b</sup>, Qiong Wu<sup>a</sup>, Chengwu Zhang<sup>a\*</sup>, Lin Li<sup>a\*</sup> and Wei Huang<sup>a,b</sup>

<sup>a</sup>*Key Laboratory of Flexible Electronics (KLOFE) & Institute of Advanced Materials (IAM),  
Nanjing Tech University (NanjingTech), 30 South Puzhu Road, Nanjing 211800, P. R.  
China.*

<sup>b</sup>*Frontiers Science Center for Flexible Electronics, Xi'an Institute of Flexible Electronics (IFE)  
and Xi'an Institute of Biomedical Materials & Engineering, Northwestern Polytechnical  
University, 127 West Youyi Road, Xi'an 710072, China*

*\*Corresponding authors. E-mail address: [iamcwzhang@njtech.edu.cn](mailto:iamcwzhang@njtech.edu.cn); [iamlli@njtech.edu.cn](mailto:iamlli@njtech.edu.cn)*

*† These authors contributed equally to this work.*

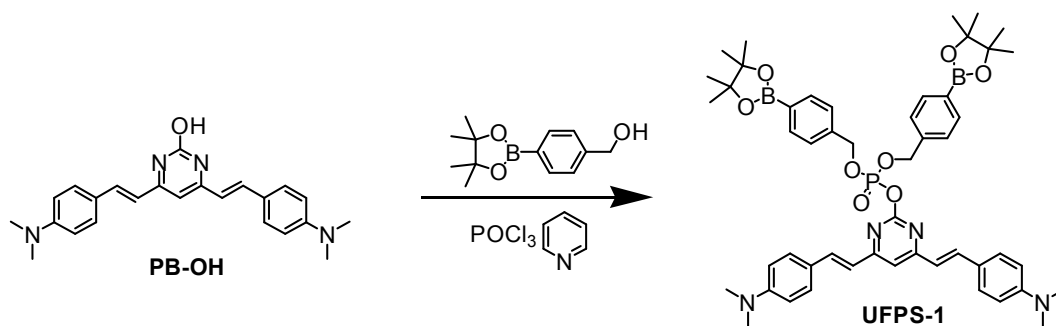

**Figure S1.** Synthesis method of **UFPS-1**.

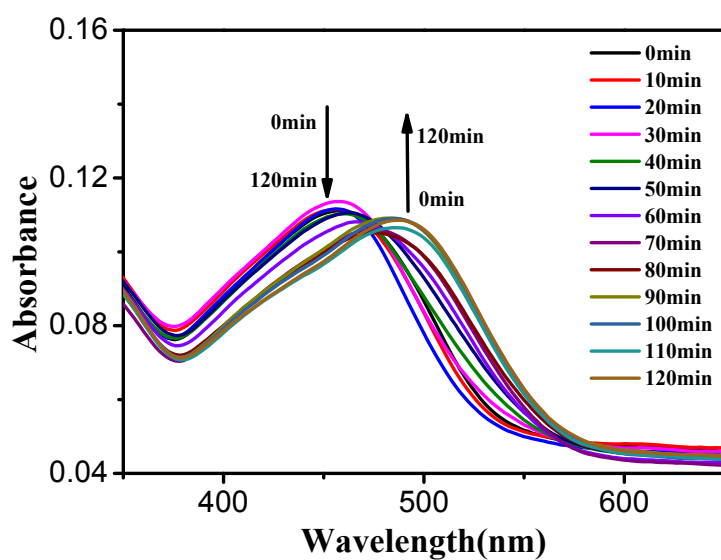

**Figure S2.** Absorbance spectra of **UFPS-1** (2  $\mu\text{M}$ ) in DMSO/PBS (1/500) buffer (pH=7.4, 10 mM) mixture in the presence of  $\text{H}_2\text{O}_2$  (200  $\mu\text{M}$ ) at different time (0-120 min).

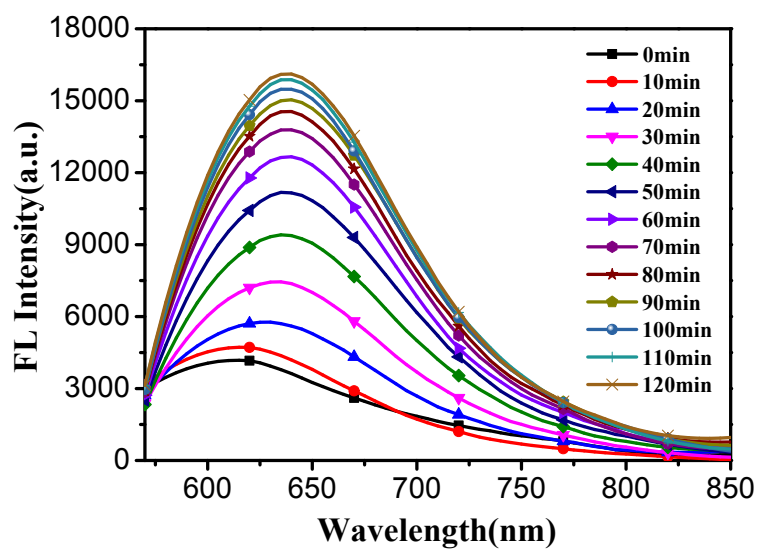

**Figure S3.** Fluorescence response of **UFPS-1** (2  $\mu\text{M}$ ) in DMSO/PBS (1/500) buffer (pH=7.4, 10 mM) mixture in the presence of  $\text{H}_2\text{O}_2$  (200  $\mu\text{M}$ ) at different time (0-120 min).

**Orbital energy level diagram of possible intermediates**

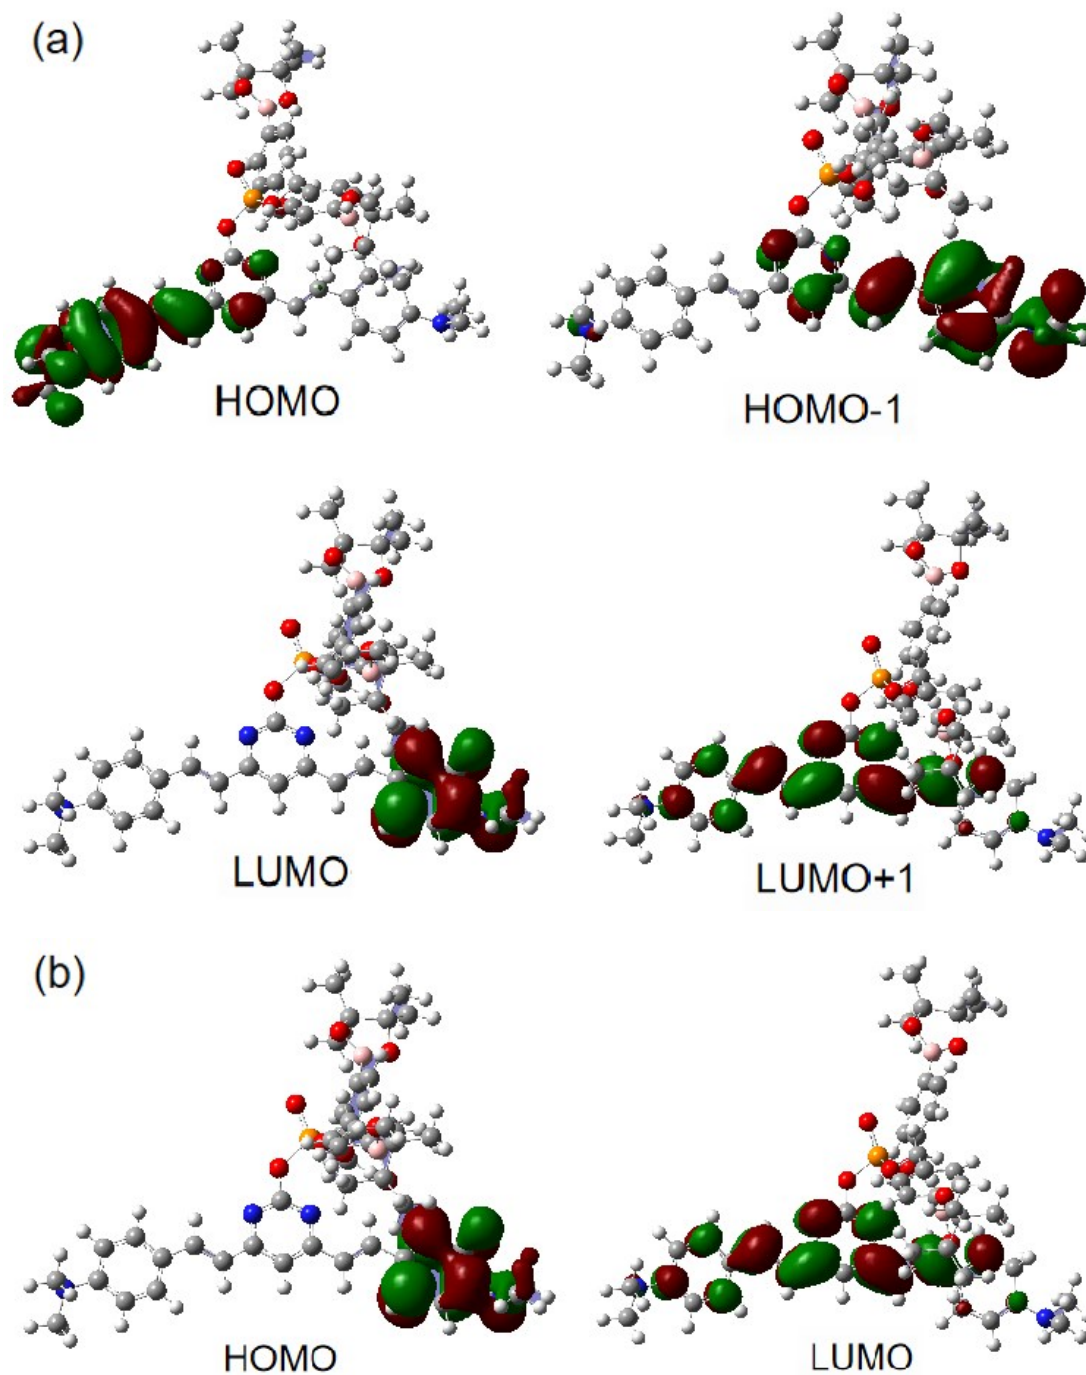

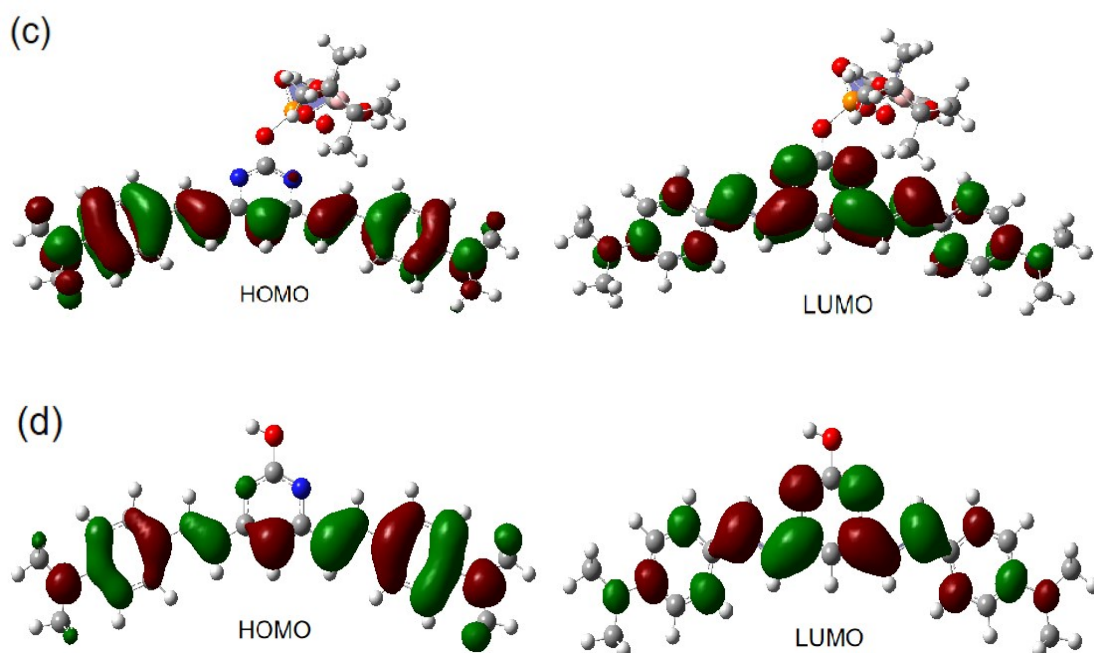

**Figure S4.** The orbital energy level map of intermediates that **UFPS-1** may produce during the detection of hydrogen peroxide. (a) **UFPS-1**; (b) and (c) possible intermediate; (d) **PB-OH**. In the ball-and-stick representation, carbon, hydrogen, nitrogen, oxygen, boron and phosphorus atoms are colored in gray, white, blue, red, pink and yellow, respectively.

### Speculated reaction mechanism

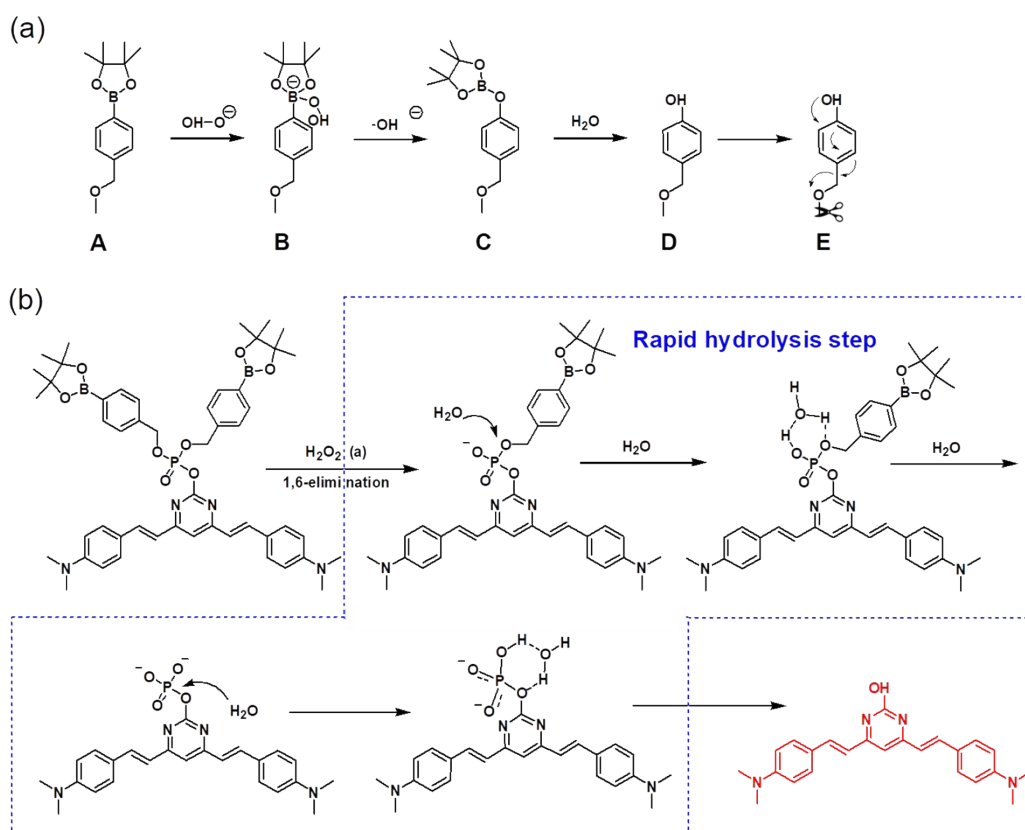

**Figure S5.** Proposed reaction mechanism of (a) borate ester and (b) **UFPS-1** upon  $\text{H}_2\text{O}_2$  detection.

We propose the probe reaction mechanism as follow: first, when  $\text{H}_2\text{O}_2$  nucleophilically attacks the boron atom, it will form an intermediate **B**, **B** will rearrange to form an unstable structure **C** that will be rapidly hydrolyzed, thus the borate ester group will be removed and form **D**. After that, the remaining 4-(hydroxymethyl)phenol group (**E**) will be further cleaved under the mechanism of 1,6-benzyl elimination and expose the phosphate group (a). It is reported that benzyl phosphate could be easily hydrolyzed under aqueous condition,<sup>[1]</sup> and finally released the deep-red fluorescent dye **PB-OH** (b).

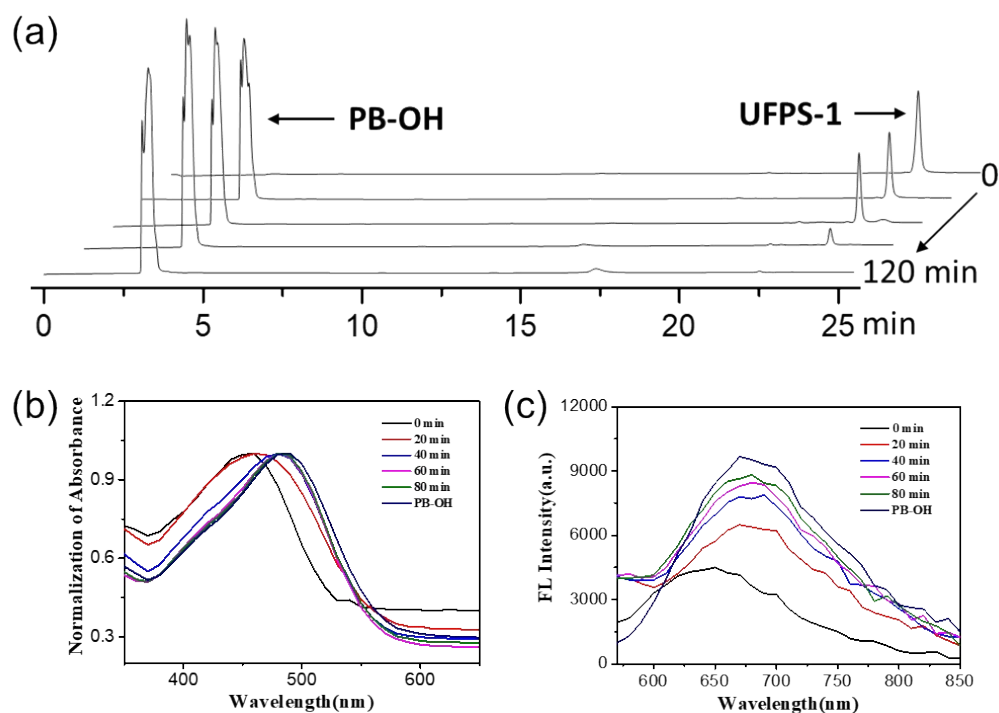

**Figure S6.** (a) The HPLC spectra (a), UV-vis (b) and fluorescence (c) spectra of the probe **UFPS-1** ( $5 \mu\text{M}$ ) response to  $\text{H}_2\text{O}_2$  ( $1 \text{ mM}$ ) from 0 to 120 min.

### The method for determining the limit of detection (LOD)

As the  $\text{H}_2\text{O}_2$  concentration increased from 0 to  $20 \mu\text{M}$ , the fluorescence intensity at  $640 \text{ nm}$  was linearly fitted to obtain a calibration curve. As can be seen from Fig S3, the slope ( $S$ ) of the curve is  $101 \mu\text{M}^{-1}$  ( $R^2 = 0.974$ ). The  $\sigma$  value in Table S1 is 3.0882. The detection limit of **UFPS-1** for  $\text{H}_2\text{O}_2$  was calculated according to the formula ( $3\sigma/S$ ) to be  $92 \text{ nM}$ .<sup>[2]</sup>

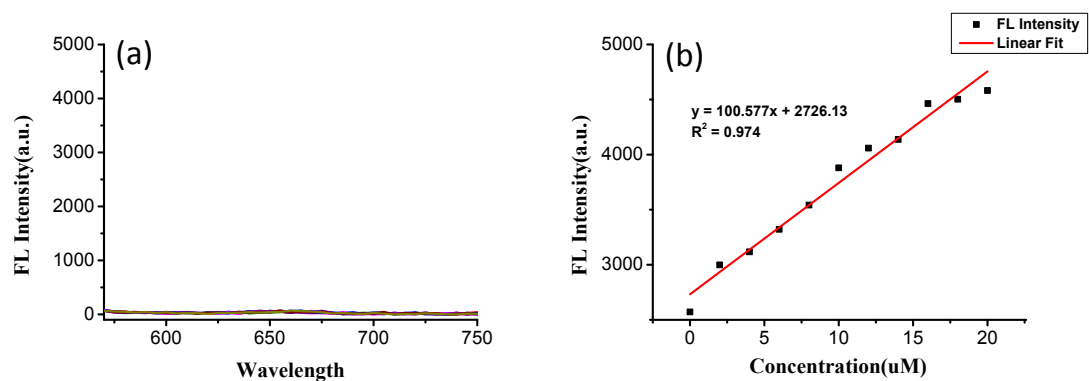

**Figure S7.** (a) Multi-recorded fluorescence spectra of blank measurement. (b) Calibration curve of emission intensity at 640 nm of **UFPS-1**.  $\lambda_{\text{ex}} = 540$  nm.

**Table S1.** The data for standard deviation ( $\sigma$ ) of blank measurement from **Figure S4**.

| Emission Intensity at 640 nm |    |    |    |    | $\sigma$ (F) |
|------------------------------|----|----|----|----|--------------|
| 40                           | 37 | 42 | 40 | 38 | 3.0882       |
| 31                           | 44 | 40 | 43 | 38 |              |
| 42                           | 42 | 44 | 36 | 42 |              |
| 39                           | 40 | 40 | 37 | 41 |              |

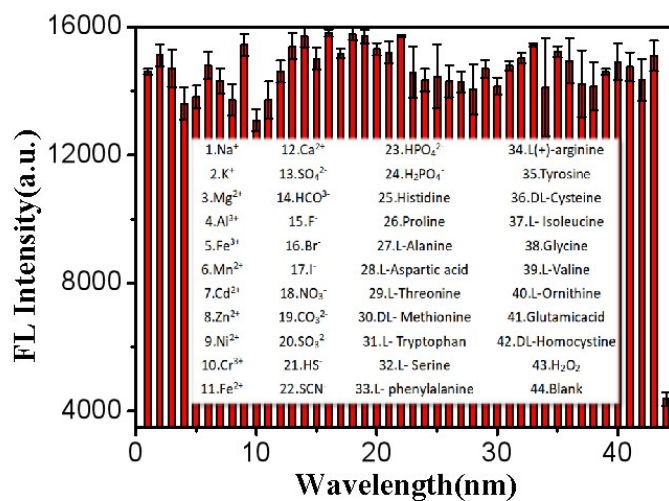

**Figure S8.** The effect of 43 analytes (100 equiv.) on the fluorescence response of **UFPS-1** (2  $\mu$ M) to H<sub>2</sub>O<sub>2</sub> (100 equiv.).  $\lambda_{\text{ex}} = 540$  nm.

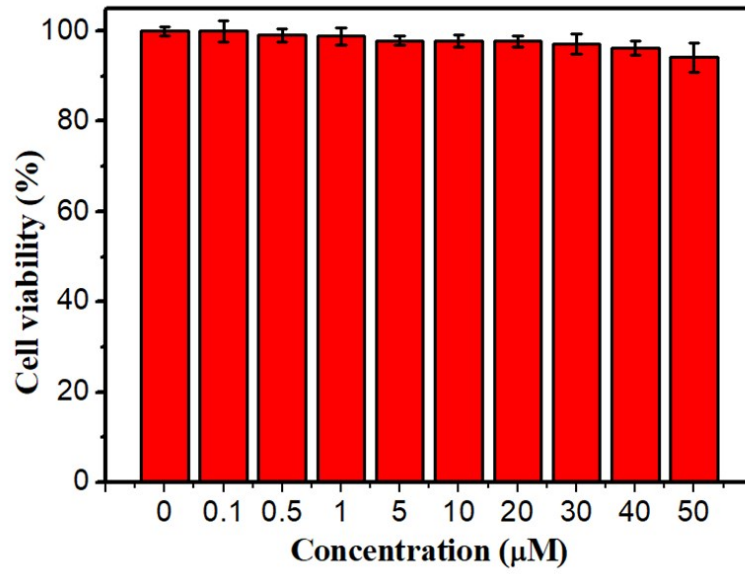

**Figure S9.** Survive rate of HepG-2 cells after incubated with various concentrations of UFPS-1 for 24 h.

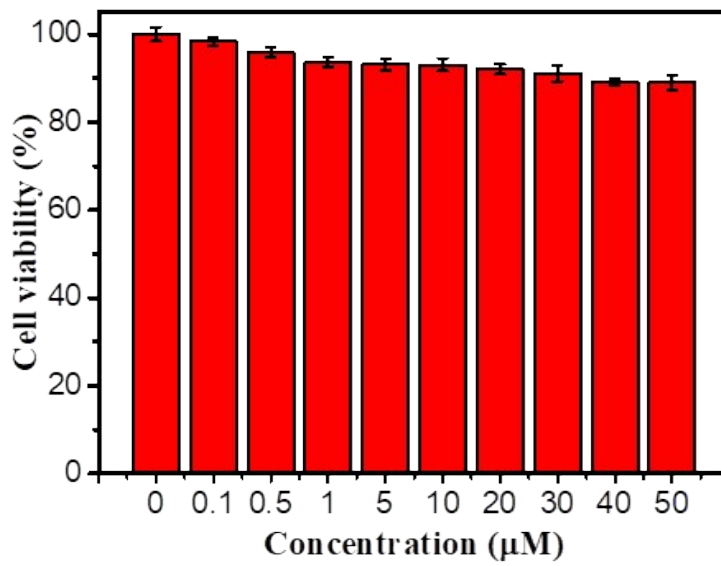

**Figure S10.** Survive rate of LO2 cells after incubated with various concentrations of UFPS-1 for 24 h.

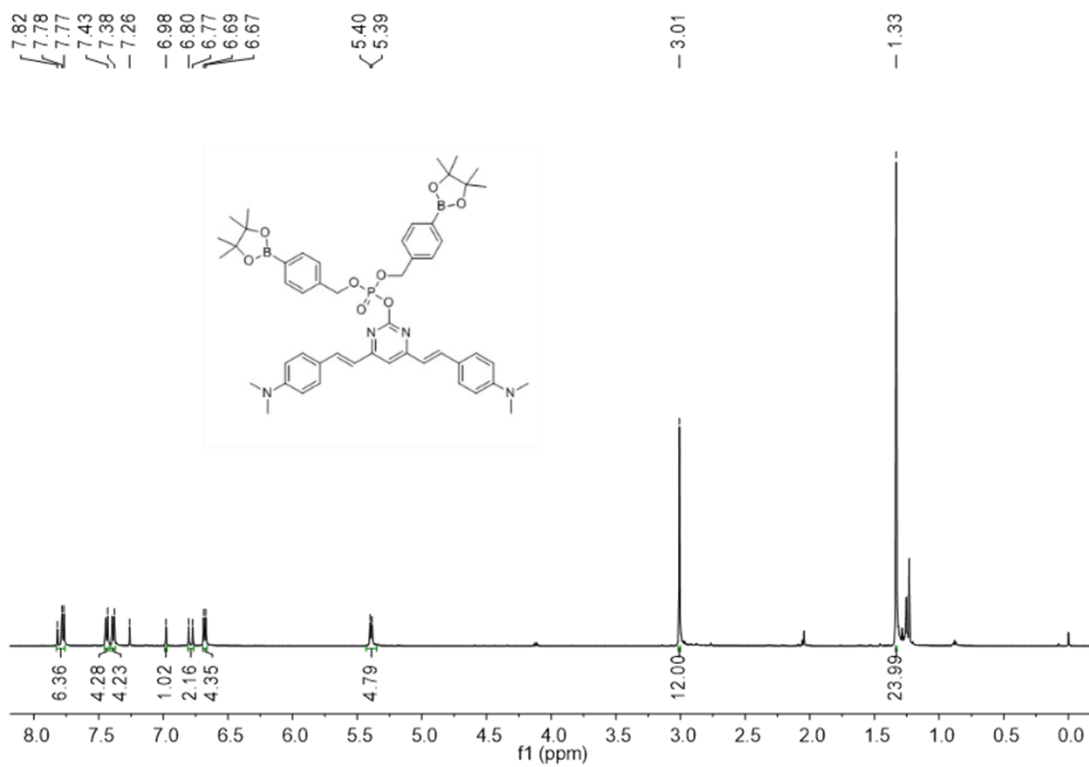

Figure S11. <sup>1</sup>H NMR spectrum of UFPS-1

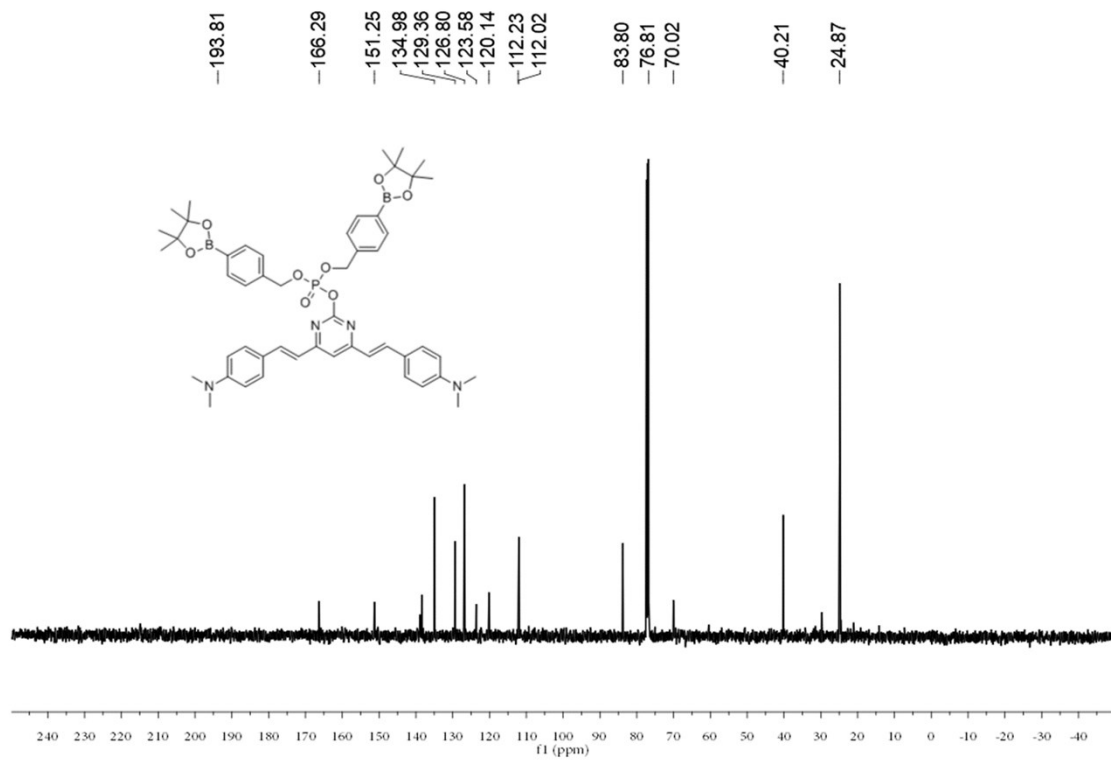

Figure S12. <sup>13</sup>C NMR spectrum of UFPS-1.



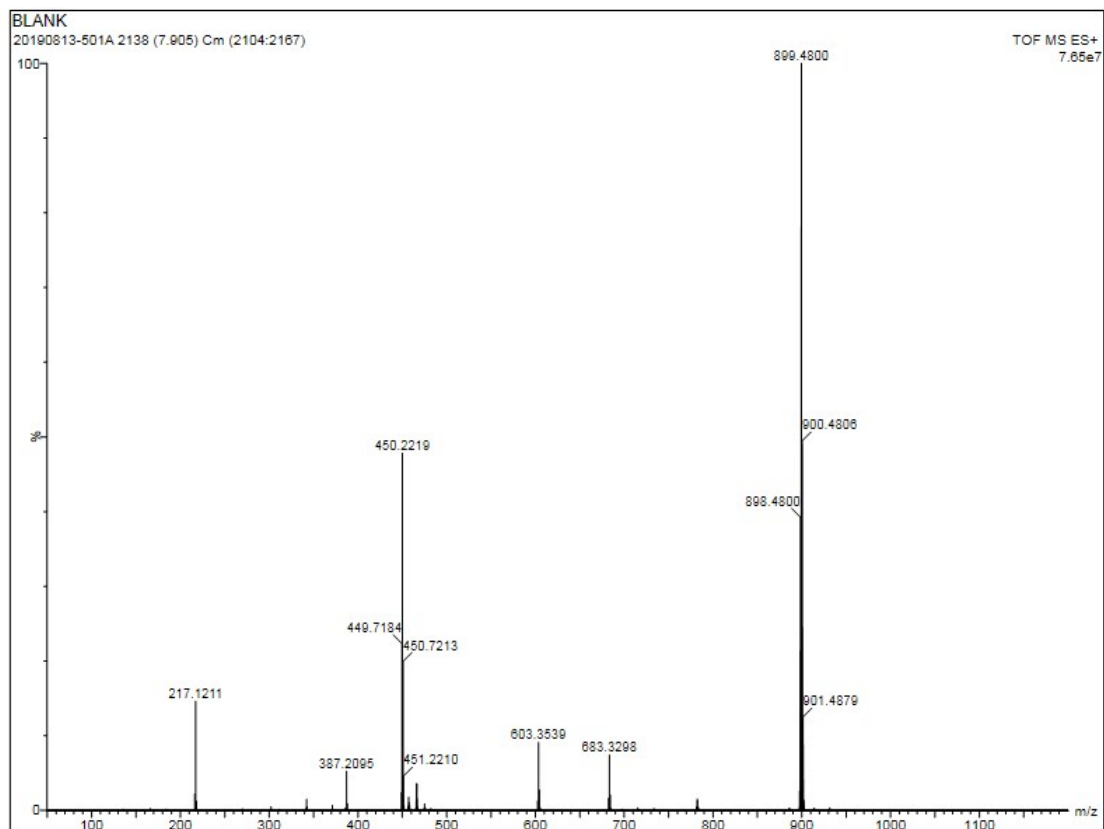

**Figure S13.** HRMS spectrum of **UFPS-1**

### Reference

- [1] J. Kumamoto and F. H. Westheimer, The Hydrolysis of Mono- and Dibenzyl Phosphates. *J. Am. Chem. Soc.* 1955, 77, 2515-2518;
- [2] Ma F, Liu M, Wang Z-y, Zhang C-y. Multiplex detection of histone-modifying enzymes by total internal reflection fluorescence-based single-molecule detection. *Chem. Comm.* 2016; 52:1218-21.
